# Supplementary material for: Hydroxyapatite from Natural Sources for Medical Applications
Source: MDPI journal article supplement (doi:10.3390/ma15155091), 2022-07-22
Supplement: s1 [file s1]

# Hydroxyapatite from natural sources for medical applications

Laura Madalina Cursaru<sup>1\*</sup>, Miruna Iota<sup>1</sup>, Roxana Mioara Piticescu<sup>1\*</sup>, Daniela Tarnita<sup>2</sup>, Sorin Vasile Savu<sup>3</sup>, Ionel Dănuț Savu<sup>3</sup>, Gabriela Dumitrescu<sup>4</sup>, Diana Mihaela Popescu<sup>4</sup>, Radu-Gabriel Hertzog<sup>4</sup> and Mihaela Calin<sup>1,5</sup>

\* Correspondence: mpopescu@imnr.ro (L.M.C.); roxana.piticescu@imnr.ro (R.M.P.)

## Results

|                                | Size (d.nm):         | % Intensity: | St Dev (d.n... |
|--------------------------------|----------------------|--------------|----------------|
| <b>Z-Average (d.nm):</b> 76.01 | <b>Peak 1:</b> 79.64 | 100.0        | 18.62          |
| <b>Pdl:</b> 0.009              | <b>Peak 2:</b> 0.000 | 0.0          | 0.000          |
| <b>Intercept:</b> 0.872        | <b>Peak 3:</b> 0.000 | 0.0          | 0.000          |
| <b>Result quality:</b> Good    |                      |              |                |

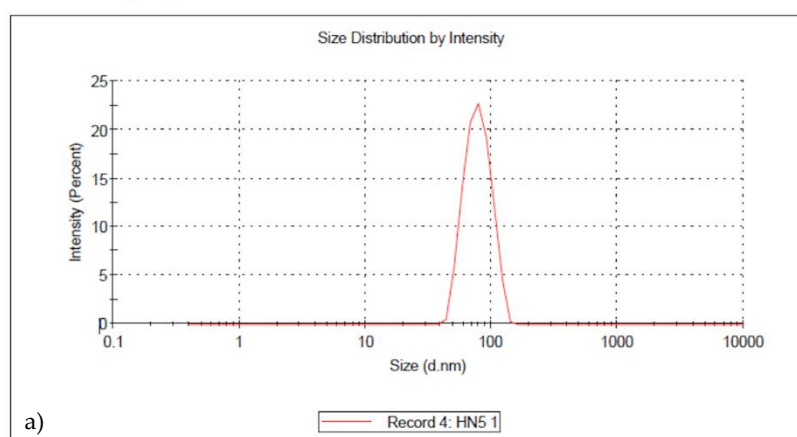

## Results

|                                | Size (d.nm):         | % Intensity: | St Dev (d.n... |
|--------------------------------|----------------------|--------------|----------------|
| <b>Z-Average (d.nm):</b> 84.11 | <b>Peak 1:</b> 93.36 | 100.0        | 29.80          |
| <b>Pdl:</b> 0.087              | <b>Peak 2:</b> 0.000 | 0.0          | 0.000          |
| <b>Intercept:</b> 0.887        | <b>Peak 3:</b> 0.000 | 0.0          | 0.000          |
| <b>Result quality:</b> Good    |                      |              |                |

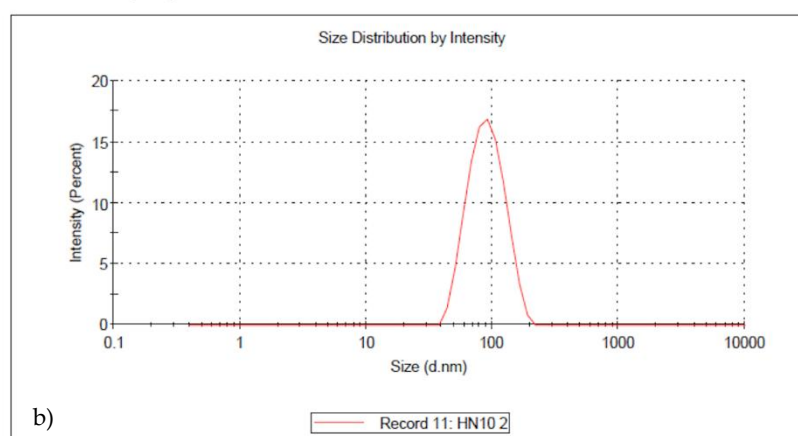

# Results

|                                | Size (d.nm):         | % Intensity: | St Dev (d.n... |
|--------------------------------|----------------------|--------------|----------------|
| <b>Z-Average (d.nm):</b> 97.57 | <b>Peak 1:</b> 107.4 | 100.0        | 34.34          |
| <b>Pdl:</b> 0.085              | <b>Peak 2:</b> 0.000 | 0.0          | 0.000          |
| <b>Intercept:</b> 0.915        | <b>Peak 3:</b> 0.000 | 0.0          | 0.000          |
| <b>Result quality :</b> Good   |                      |              |                |

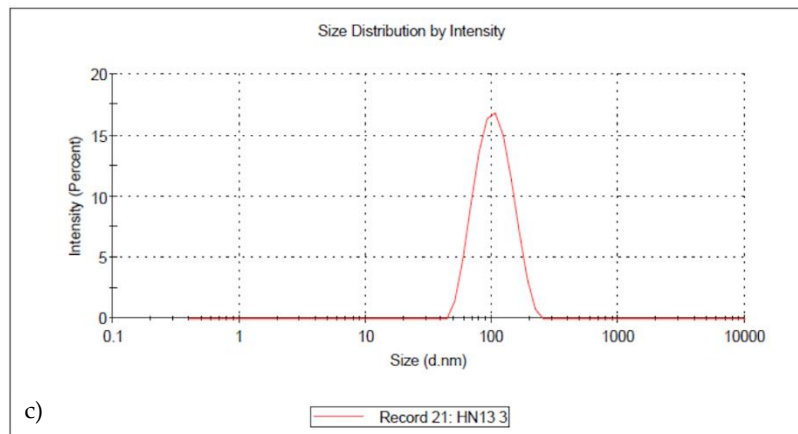

**Figure S1.** Particle size distribution of: a) HAP-20; b) HAP-60 and c) HAP-100 nanopowders.

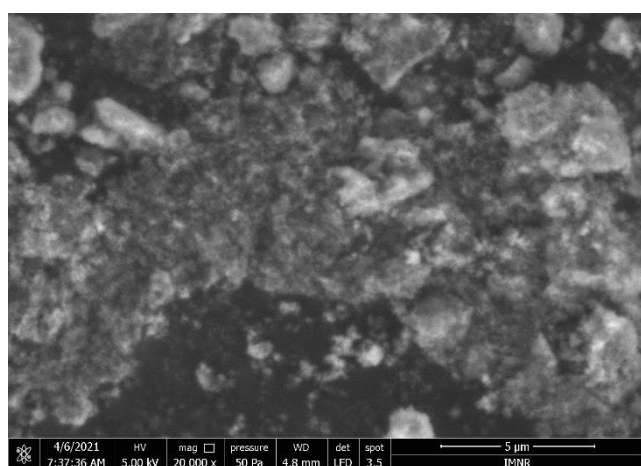

a)

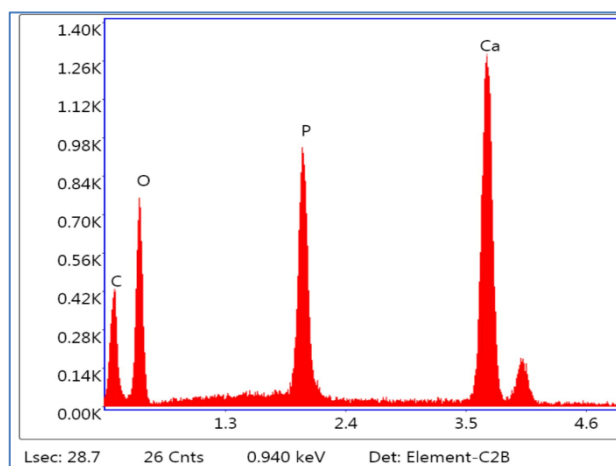

b)

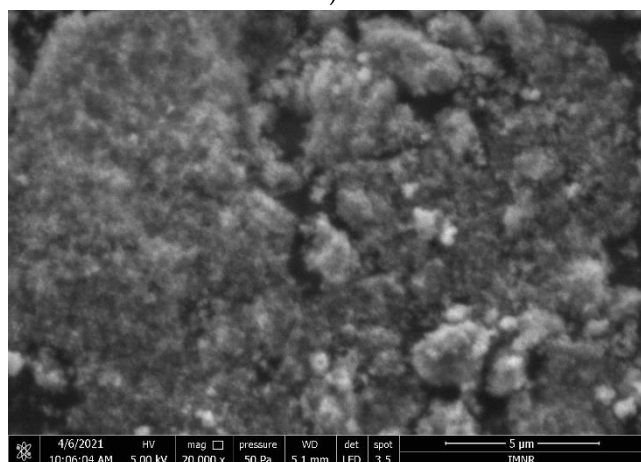

c)

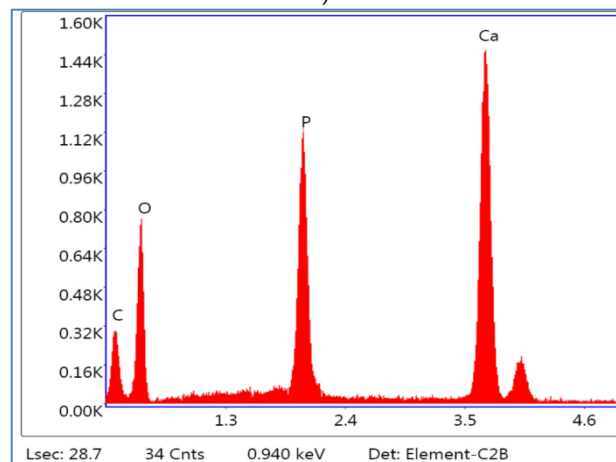

d)

**Figure S2.** SEM images at 5 μm scale bar, 5 kV voltage and 20 kX magnification, and EDS spectra of HAP nanopowders: a) and b) HAP-20; c) and d) HAP-60.
